# Supplementary material for: Effect of Ginseng Extracts on the Improvement of Osteopathic and Arthritis Symptoms in Women with Osteopenia: A Randomized, Double-Blind, Placebo-Controlled Clinical Trial
Source: MDPI journal article supplement (doi:10.3390/nu13103352), 2021-09-24
Supplement: s1 [file s1]

**Supplementary Table S1.** Laboratory profiles of the participants

| Laboratory profiles<br>(standard range) | GE<br>Low(1g) group (n=30) |              | GE<br>High(3g) group (n=30) |              | Placebo group (n=30) |              | p-value <sup>1</sup> |
|-----------------------------------------|----------------------------|--------------|-----------------------------|--------------|----------------------|--------------|----------------------|
|                                         | Week 0                     | Week 12      | Week 0                      | Week 12      | Week 0               | Week 12      |                      |
| WBC (4.8–10.8×10 <sup>3</sup> /μL)      | 5.30±1.72                  | 5.08±1.42    | 5.07±1.12                   | 4.83±1.04    | 4.94±1.03            | 4.70±0.83    | 0.951                |
| RBC (4.2–5.4×100 <sup>3</sup> /μL)      | 4.35±0.32                  | 4.32±0.34    | 4.41±0.30                   | 4.42±0.29    | 4.40±0.33            | 4.41±0.27    | 0.825                |
| Hemoglobin (12–16 g/dL)                 | 13.24±0.89                 | 13.09±0.82   | 13.31±0.76                  | 13.30±0.81   | 13.34±0.86           | 13.38±0.78   | 0.539                |
| Hematocrit (37–47%)                     | 39.08±2.37                 | 39.52±2.26   | 39.37±39.96                 | 39.96±2.11   | 39.59±2.42           | 40.27±2.13   | 0.947                |
| Platelet (130–450×10 <sup>3</sup> /μL)  | 262.47±46.60               | 266.03±44.10 | 255.57±51.49                | 263.27±55.09 | 249.43±54.92         | 255.81±61.72 | 0.800                |
| ALP (8–48 IU/L)                         | 79.73±14.95                | 81.24±16.22  | 75.33±16.45                 | 78.43±16.67  | 86.63±21.45          | 86.19±19.53  | 0.302                |
| GGT (8–48 IU/L)                         | 18.90±10.91                | 20.24±13.37  | 18.23±10.96                 | 17.53±10.92  | 19.47±9.99           | 1.07±11.80   | 0.372                |
| AST (12–33 IU/L)                        | 23.77±4.97                 | 23.34±5.72   | 24.00±4.90                  | 22.67±3.30   | 24.07±4.98           | 24.85±5.16   | 0.258                |
| ALT (5–35 IU/L)                         | 24.50±10.46                | 23.45±12.41  | 23.97±10.10                 | 21.60±4.87   | 23.10±8.14           | 23.70±7.52   | 0.400                |
| Total bilirubin (0.2–1.2 mg/dL)         | 0.81±0.25                  | 0.77±0.17    | 0.74±0.17                   | 0.71±0.15    | 0.82±0.28            | 0.80±0.16    | 0.973                |
| Total protein (6.7–8.3 g/dL)            | 7.26±0.30                  | 7.38±0.28    | 7.30±0.22                   | 7.51±0.26    | 7.22±0.34            | 7.33±0.39    | 0.324                |
| Albumin (3.5–5.3 g/dL)                  | 4.29±0.8                   | 4.29±0.14    | 4.36±0.18                   | 4.36±0.18    | 4.32±0.18            | 4.31±0.17    | 0.977                |
| BUN (8–23 mg/dL)                        | 13.87±2.71                 | 14.90±3.95   | 14.07±2.92                  | 14.33±3.02   | 13.83±3.96           | 13.70±2.766  | 0.394                |
| Creatinine (0.7–1.7 mg/dL)              | 0.60±0.09                  | 0.58±0.08    | 0.56±0.10                   | 0.55±0.09    | 0.56±0.08            | 0.55±0.09    | 0.918                |
| Total cholesterol (mg/dL)               | 205.87±25.38               | 211.21±25.09 | 199.97±33.52                | 210.53±37.41 | 209.97±34.30         | 211.70±38.29 | 0.198                |
| Triglyceride (mg/dL)                    | 121.40±36.57               | 137.69±77.78 | 129.7±73.85                 | 110.93±45.23 | 122.47±79.64         | 119.67±70.16 | 0.065                |
| HDL-cholesterol (mg/dL)                 | 55.70±13.38                | 56.86±14.95  | 52.27±11.40                 | 54.00±11.10  | 58.90±15.70          | 58.41±15.01  | 0.309                |
| LDL-cholesterol (mg/dL)                 | 125.89±25.56               | 126.81±25.02 | 121.71±30.86                | 134.35±33.30 | 126.57±27.86         | 129.36±30.71 | 0.050                |
| Glucose (74–106 mg/dL)                  | 85.43±6.94                 | 85.69±8.50   | 84.80±6.39                  | 85.50±7.44   | 87.00±7.94           | 85.22±7.56   | 0.370                |
| Estradiol (pg/mL)                       | 83.46±32.65                | 78.55±23.98  | 79.99±27.59                 | 76.63±26.90  | 83.67±29.94          | 79.61±32.26  | 0.386                |

|                          |              |              |              |               |              |              |       |
|--------------------------|--------------|--------------|--------------|---------------|--------------|--------------|-------|
| FSH (mIL/MI)             | 374.50±45.77 | 395.03±50.78 | 391.10±51.84 | 406.987±69.75 | 392.03±48.68 | 403.26±52.03 | 0.932 |
| LDH (IU/L)               | 9.79±23.86   | 6.66±6.34    | 6.18±2.92    | 5.64±1.85     | 8.11±12.18   | 13.65±32.07  | 0.838 |
| Creatinine Kinase (IU/L) | 86.07±29.90  | 103.59±58.95 | 96.23±49.60  | 102.70±50.97  | 91.70±37.95  | 128.00±91.64 | 0.217 |
| Specific Gravity         | 1.02±0.00    | 1.02±0.01    | 1.02±0.00    | 1.02±0.01     | 1.02±0.01    | 1.02±0.01    | 0.974 |
| pH                       | 5.85±0.80    | 6.16±0.85    | 5.93±0.96    | 5.97±0.92     | 6.27±0.80    | 6.33±0.93    | 0.369 |

Data are presented as mean ± SD.

<sup>1</sup>Analyzed by linear mixed model.

Abbreviations: GE, Ginseng Extract; WBC, White Blood Cell; RBC, Red Blood Cell; ALP, Alkaline Phosphatase; GGT, Gamma Glutamyl Transferase; AST, Aspartate Transaminase; ALT, Alanine Transaminase; BUN, Blood Urea Nitrogen; CK, creatine kinase; LDH, lactate dehydrogenase; FSH, follicle stimulating hormone.
